# Supplementary material
Source: PubMed Central journal article supplement (PMC3607188)
Supplement: 97320630009293S1.pdf [file 97320630009293S1.pdf]

## Supplementary material:

**Table 1:** The inhibitors with their characteristics of binding screened by Docking server

| S. no | Name of the Inhibitor            | Estimated free energy (Kcal/Mol) | Estimated Ki (μM) | VdW + HBond+ Energy (Kcal/ Mol) | Dsolv. | Electrostatic Energy (Kcal/Mol) | Total Intermolecular Energy (Kcal/ Mol) | Interaction surface |
|-------|----------------------------------|----------------------------------|-------------------|---------------------------------|--------|---------------------------------|-----------------------------------------|---------------------|
| 1     | Bestatin                         | -5.46                            | 98.81             | -6.6                            |        | 0.41                            | -6.2                                    | 726.026             |
| 2     | Sitagliptin                      | -9.30                            | 0.152             | -8.10                           |        | -2.28                           | -10.39                                  | 678.630             |
| 3     | Chloridoxipoxide                 | -7.25                            | 4.84              | -6.16                           |        | -1.72                           | -7.88                                   | 706.802             |
| 4     | Alprazolam                       | -6.96                            | 7.94              | -7.25                           |        | 0                               | -7.26                                   | 765.015             |
| 5     | Ergotamine                       | -6.65                            | 13.33             | -8                              |        | 0.2                             | -7.8                                    | 1139.616            |
| 6     | Dihydro ergotamine               | -6.33                            | 22.78             | -8.28                           |        | 1.21                            | -7.08                                   | 1209.638            |
| 7     | 4,7 Dimethyl 1,10 phenanthroline | -6.23                            | 27.24             | -6.06                           |        | -0.16                           | -6.23                                   | 577.074             |
| 8     | 9,4hydroxy phenanthroline        | -5.61                            | 77.01             | -6.19                           |        | 0.28                            | -5.91                                   | 617.481             |
| 9     | Camptothecin                     | -5.53                            | 88.64             | -6.55                           |        | 1.12                            | -5.43                                   | 788.058             |
